# Supplementary material for: Importance of microphysical settings for climate forcing by stratospheric SO 2 injections as modelled by SOCOL-AERv2
Source: Copernicus journal article supplement (doi:10.5194/egusphere-2023-1726), 2023-09-11
Supplement: Supplementary file 1 [file egusphere-2023-1726-supplement.pdf]

# Supplement of "Importance of microphysical settings for climate forcing by stratospheric SO<sub>2</sub> injections as modelled by SOCOL-AERv2"

## S1 Summary of sulfur burdens and fluxes

Table S1 summarizes numerical results of sulfur burdens and fluxes for most of the simulations performed in this study. 5 Simulations names are the same as in Table 1. In addition, the index "\_no\_interp." refers to the old representation of passing the H<sub>2</sub>SO<sub>4</sub> produced from the gas-phase chemistry routine to the microphysics module in one go, rather than splitting it properly among the  $N_{\text{micro}}$  substeps.

**Table S1.** Global total and stratospheric aerosol burden (Gg(S)), as well as stratospheric sulfur fluxes between condensed and gas phase due to nucleation, condensation and evaporation (Gg(S) yr<sup>-1</sup>). The net cross-tropopause flux of sulfate aerosol (Gg(S) yr<sup>-1</sup>) is calculated by balancing the stratospheric sulfur fluxes between condensed and gas phase, assuming the stratospheric aerosol burden to be in equilibrium.

| Simulation name       | Total burden | Stratospheric burden | Nucleation | Condensation | Evaporation | Net cross-tropopause |
|-----------------------|--------------|----------------------|------------|--------------|-------------|----------------------|
| BG_CN_20_no_interp.   | 708.8        | 167.7                | 29.9       | 82.7         | 5.9         | 106.7                |
| BG_CN_20              | 704.4        | 164.6                | 1.4        | 113.1        | 5.3         | 109.2                |
| BG_NC_20_no_interp.   | 709.1        | 165.7                | 32.0       | 80.9         | 4.9         | 108.0                |
| BG_NC_20              | 705.4        | 166.1                | 9.6        | 109.0        | 5.8         | 112.8                |
| S5_CN_20              | 4582.0       | 3710.9               | 1.8        | 5076.3       | 4.6         | 5073.5               |
| S5_CN_200             | 4787.3       | 3916.4               | 78.2       | 5005.8       | 5.5         | 5078.5               |
| S5_NC_20              | 4825.2       | 3954.7               | 532.4      | 4549.1       | 5.9         | 5075.6               |
| S5_NC_200             | 4788.0       | 3924.2               | 113.9      | 4967.8       | 5.6         | 5076.1               |
| S25_CN_20             | 16699.6      | 14663.5              | 1.9        | 25050.1      | 4.1         | 25047.9              |
| S25_CN_200_no_interp. | 18687.9      | 16667.5              | 9138.8     | 15572.3      | 4.6         | 24706.5              |
| S25_CN_200            | 18423.3      | 16396.8              | 102.1      | 24951.5      | 4.2         | 25049.4              |
| S25_NC_20             | 22309.2      | 20296.3              | 11345.9    | 14152.5      | 447.2       | 25051.2              |
| S25_NC_200_no_interp. | 18865.9      | 16840.9              | 21090.5    | 3623.2       | 7.2         | 24706.5              |
| S25_NC_200            | 18610.1      | 16587.2              | 331.7      | 24725.6      | 4.0         | 25053.3              |
| S25_NC_60             | 18694.9      | 16677.8              | 1086.9     | 23965.0      | 4.1         | 25047.8              |
| BG_CN_20 (SOCOLv4)    | 432          | 150                  | 10         | 110          | 10          | 110                  |
| S5p_CN_20 (SOCOLv4)   | 4875         | 4240                 | 10         | 4960         | 20          | 4970                 |
| S5p_NC_20 (SOCOLv4)   | 5907         | 5290                 | 4290       | 840          | 180         | 4950                 |

## S2 Importance of proper treatment of gasphase H<sub>2</sub>SO<sub>4</sub> concentrations

In previous versions of SOCOL-AER the total amount of H<sub>2</sub>SO<sub>4</sub> molecules produced by the chemistry scheme, which is called every two hours, was directly passed to the microphysical loop. The gaseous H<sub>2</sub>SO<sub>4</sub> concentration was then consecutively updated by condensation and nucleation. This approach leads to an artificial spike in H<sub>2</sub>SO<sub>4</sub> concentrations and supersaturations each time at the beginning of the microphysical calculation, which then gradually decrease over the microphysical loop. In reality, however, chemical H<sub>2</sub>SO<sub>4</sub> production as well as nucleation and condensation occur continuously, resulting in a smoother evolution of atmospheric H<sub>2</sub>SO<sub>4</sub> supersaturations. Therefore, it is important to distribute the chemical H<sub>2</sub>SO<sub>4</sub> production uniformly among the  $N_{\text{micro}}$  substeps, in particular under high sulfur conditions. This is done by updating the gasphase H<sub>2</sub>SO<sub>4</sub> concentration by the term  $\Delta \text{H}_2\text{SO}_4 / N_{\text{micro}}$  after each microphysical substep, with  $\Delta \text{H}_2\text{SO}_4 = \text{H}_2\text{SO}_4_{\text{afterchemistry}} - \text{H}_2\text{SO}_4_{\text{beforechemistry}}$  being the total amount of chemically produced H<sub>2</sub>SO<sub>4</sub> molecules produced in one chemical timestep (Fig. 1). This avoids erroneously large H<sub>2</sub>SO<sub>4</sub> concentrations at the beginning of the microphysical loop.

Figure S1 compares the resulting size distributions for the model versions with and without (`_no_interp.`) interpolation of the chemical H<sub>2</sub>SO<sub>4</sub> production with  $N_{\text{micro}} = 200$ . In the `_no_interp.` case, the gas-phase H<sub>2</sub>SO<sub>4</sub> reaches its equilibrium vapor pressure through nucleation and condensation within the first few iterations of  $N_{\text{micro}}$ . During the remaining iterations of  $N_{\text{micro}}$  coagulation is the only process influencing the size distribution. This results in a peak in the nucleation mode around 3 nm and in higher number concentrations below 0.3  $\mu\text{m}$  compared with S25\_NC\_200. The new setup which accounts for the interpolation of H<sub>2</sub>SO<sub>4</sub> production within the microphysical subloop, however, results in more reasonable nucleation and condensation rates in which the nucleation mass flux is only 1-4 % of the condensation mass flux (see Table S1). The new treatment of the gas-phase H<sub>2</sub>SO<sub>4</sub> is especially important when dealing with high H<sub>2</sub>SO<sub>4</sub> supersaturations, but has no significant effect under background conditions (see BG simulations in Table S1). All the data presented in this paper account for the interpolation of H<sub>2</sub>SO<sub>4</sub> production within the microphysical subloop.

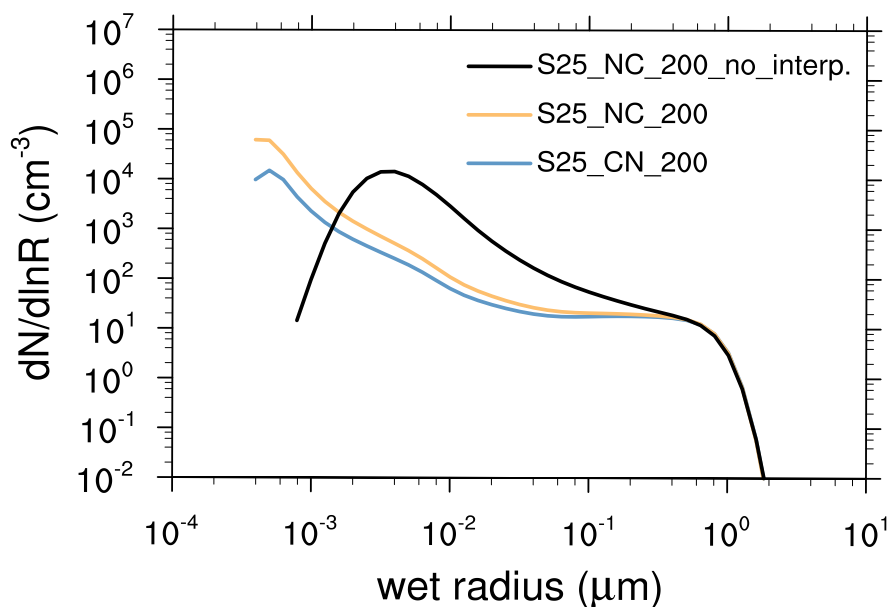

**Figure S1.** Size distributions ( $dN/d\ln R$ , particles  $\text{cm}^{-3}$ ) averaged between 30°S and 30°N at 55 hPa for the model simulations with regional SO<sub>2</sub> injections of 25 Tg(S) yr<sup>-1</sup>. While the blue and orange curves show the convergence of the size distribution when interpolating the H<sub>2</sub>SO<sub>4</sub> molecules produced during the 2h-chemical timestep equally over  $N_{\text{micro}}$ , the black curve shows the resulting size distribution when passing the produced H<sub>2</sub>SO<sub>4</sub> molecules to the microphysical subloop in one go.

### S3 Influence of settings on aerosol surface area density

- 30 Climate intervention by stratospheric  $\text{SO}_2$  emission yields an increase in aerosol burden and, thus, to a larger surface area density (SAD) available for heterogeneous chemistry. The SAD does not only depend on the total burden, but also on the detailed size distribution, as smaller particles have a greater surface area per unit mass.

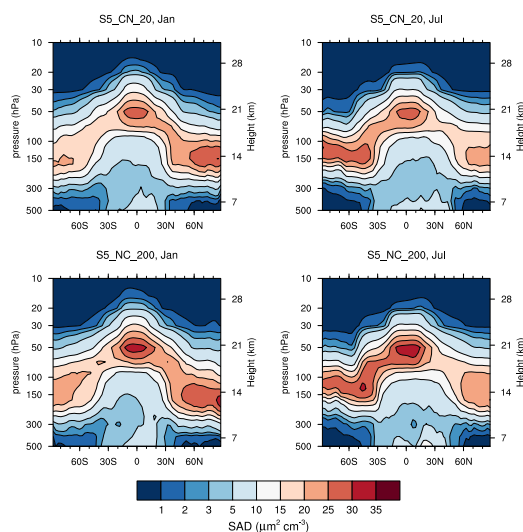

**Figure S2.** Zonal mean surface area density ( $\mu\text{m}^2\text{cm}^{-3}$ ) for January (left) and July (right) for the model simulations with  $5\text{ Tg(S) yr}^{-1}$ . Top: S5\_CN\_20, i.e. the original setting in SOCOL-AER biased towards condensation. Bottom: the unbiased S5\_NC\_200 setting.

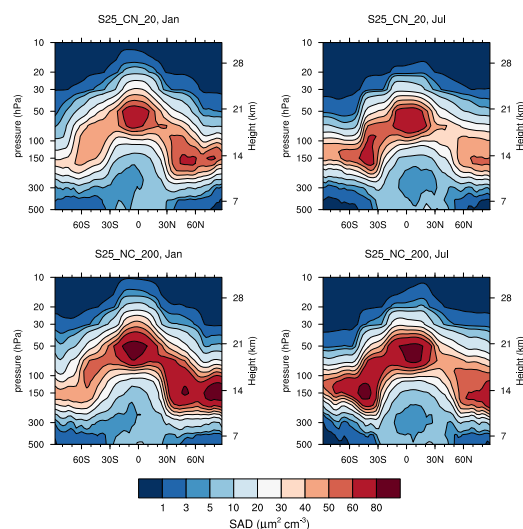

**Figure S3.** Same as Fig. S2, but for  $25\text{ Tg(S) yr}^{-1}$ .

Figures S2 and S3 show the zonal mean surface area density (SAD) of sulfate aerosol for January and July. The injection of  $\text{SO}_2$  leads to a massive increase in SAD throughout the whole lower stratosphere, with the highest SAD occurring in the polar

- 35 lowermost stratosphere, particularly during winter, and in the tropical lower stratosphere, i.e. the injection region. Figure S2 reveals substantial differences between the two S5 simulations, with S5\_NC\_200 showing about 20% higher SAD values, which can be explained by a 5% increase in the stratospheric aerosol burden (Table S1), combined with a shift in the size distribution towards smaller particles (Fig. 2).

## S4 Influence of settings on atmospheric temperature profile

- 40 Figure S4 presents changes in the tropical temperature profile for the two  $\text{SO}_2$  injection scenarios. The simulations show a heating of the lower stratosphere caused by the absorption of longwave radiation by the aqueous sulfuric acid aerosol, and a cooling above the aerosol layer due to reduced IR heating from below. For the S5 simulations, the maximum temperature change ranges between 4.5 and 5 K. For the S25 simulations, the warming of the lower stratosphere is much more pronounced and peaks around 15 K. For a given mass loading, the longwave absorption by sulfate aerosol does not strongly depend on the
- 45 particle sizes (Lacis, 2015), so that the differences between the simulations mostly reflect differences in aerosol mass loading and its vertical distribution. The difference between the simulations increases at higher levels, reflecting the enhanced upward transport of aerosol particles for simulations with many small, and thus lighter, particles. However, the range spanned by different microphysical settings is not sufficient to explain the inter-model spread presented in Weisenstein et al. (2022, their
- 50 Fig. 10): While the modeled temperature increase in MAECHAM5-HAM was only around 2 K for 5Mt/yr injection with an aerosol burden increase smaller by about 30% compared to SOCOL-AER, CESM2 showed a similar warming as SOCOL-AER, despite simulating a 50% higher aerosol burden increase.

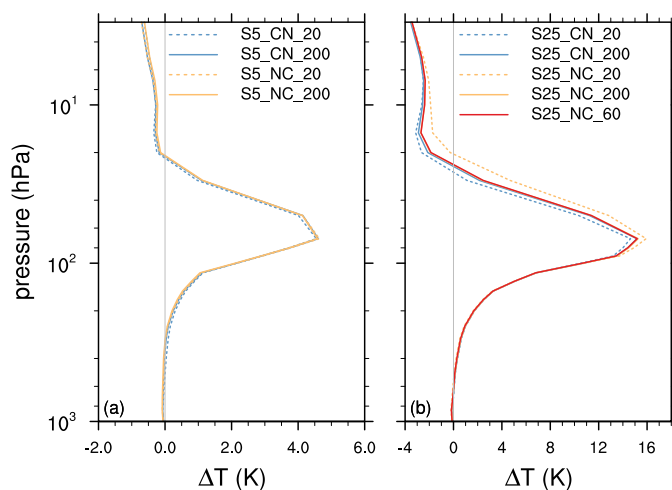

**Figure S4.** Change in atmospheric temperature (K) averaged between  $30^\circ\text{S}$  and  $30^\circ\text{N}$  due to  $\text{SO}_2$  gas injections of (a)  $5 \text{ Tg(S) yr}^{-1}$ , and (b)  $25 \text{ Tg(S) yr}^{-1}$ . The simulation BG\_CN\_20 is used as reference.

- As discussed in Weisenstein et al. (2022), the stratospheric warming could lead to a strengthening of the Brewer–Dobson circulation, which in turn might enhance the transport of  $\text{H}_2\text{O}$  into the stratosphere. The actual amount of  $\text{H}_2\text{O}$  entering the stratosphere, however, is largely controlled by the temperature at the tropical cold point tropopause ( $\sim 90 \text{ hPa}$ ). As Fig. S4
- 55 does not indicate any significant differences in the simulated temperature changes at the cold point tropopause, we do not expect an influence of the settings on the modeled changes in stratospheric  $\text{H}_2\text{O}$  concentrations.

## References

Lacis, A.: Volcanic aerosol radiative properties, *Past Global Changes Magazine*, 23, 50–51, <https://doi.org/10.22498/pages.23.2.50>, 2015.

60 Weisenstein, D. K., Visionsi, D., Franke, H., Niemeier, U., Vattioni, S., Chiodo, G., Peter, T., and Keith, D. W.: An interactive stratospheric aerosol model intercomparison of solar geoengineering by stratospheric injection of SO<sub>2</sub> or accumulation-mode sulfuric acid aerosols, *Atmos. Chem. Phys.*, 22, 2955–2973, <https://doi.org/10.5194/acp-22-2955-2022>, 2022.
